# Supplementary material for: Application of Computational Chemical Shift Prediction Techniques to the Cereoanhydride Structure Problem—Carboxylate Complications
Source: PubMed Central journal article supplement (PMC5484121; doi:10.3390/md15060171), 2017-06-12
Supplement: marinedrugs-15-00171-s001.pdf [file marinedrugs-15-00171-s001.pdf]

## Supporting Information for:

### Application of Computational Chemical Shift Prediction Techniques to the Cereosanhydride Structure Problem

C. M. Saunders and D. J. Tantillo\*

University of California – Davis, 1 Shields Ave, Davis, CA, 95616, USA

[djtantillo@ucdavis.edu](mailto:djtantillo@ucdavis.edu)

#### Table of Contents:

|                                                                           |         |
|---------------------------------------------------------------------------|---------|
| Energy profile for conformers of <b>1</b> :                               | page 2  |
| Computed chemical shifts for <b>1</b> :                                   | page 2  |
| Energy profile for conformers of <b>4</b> :                               | page 4  |
| Computed chemical shifts for <b>4</b> :                                   | page 4  |
| Energy profile for conformers of <b>2</b> :                               | page 5  |
| Computed chemical shifts for <b>2</b> :                                   | page 6  |
| Energy profile for conformers of deprotonated <b>2</b> :                  | page 7  |
| Computed chemical shifts for deprotonated <b>2</b> :                      | page 7  |
| Computed chemical shifts for H bond models and dimer:                     | page 8  |
| Computed chemical shifts for acetic acid systems:                         | page 16 |
| Energy Comparison for B3LYP – D3 Optimizations:                           | page 17 |
| NMR Shift Table for B3LYP – D3 Optimized Geometries:                      | page 17 |
| Energy profile for conformers of <b>1</b> ( B3LYP – D3):                  | page 18 |
| Computed chemical shifts for <b>1</b> (B3LYP – D3 geometry):              | page 18 |
| Energy profile for conformers of <b>4</b> (B3LYP – D3):                   | page 20 |
| Computed chemical shifts for <b>4</b> (B3LYP – D3 geometry):              | page 20 |
| Energy profile for conformers of <b>2</b> (B3LYP – D3):                   | page 21 |
| Computed chemical shifts for <b>2</b> (B3LYP – D3 geometry):              | page 22 |
| Energy profile for conformers of deprotonated <b>2</b> (B3LYP – D3):      | page 23 |
| Computed chemical shifts for deprotonated <b>2</b> (B3LYP – D3 geometry): | page 23 |
| Full Gaussian citations:                                                  | page 24 |

Compound 1 (Anhydride):

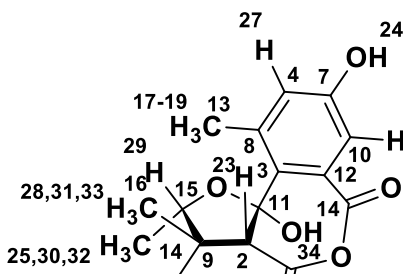

**Energy profiles** for the conformers found for compound 1. The percent population is shown, with those included in the calculation highlighted in green. Data is sorted by relative Gibb's free energy.

| B3LYP/6-31G(d) |                       |              |
|----------------|-----------------------|--------------|
|                | $\Delta G$ (kcal/mol) | % population |
| 4.log          | 0.000                 | 52.2         |
| 5.log          | 0.576                 | 19.7         |
| 1.log          | 0.701                 | 16.0         |
| 2.log          | 1.164                 | 7.3          |
| 3.log          | 1.409                 | 4.8          |
| 8.log          | 46.995                |              |

**Computed chemical shifts** (ppm) for compound 1. Values were obtained by scaling the calculated isotropic values of individual atoms, using the scaling factors noted in the method section. The chemical shifts shown are Boltzmann weighted average of the corresponding conformers. Mean absolute deviations (MADs) (between the computed and experimental numbers, ppm) maximum absolute deviations (MAXs) are also included.

| <sup>13</sup> C |        |        | Isolation <sup>1</sup> |           | Synthesis <sup>2</sup> |           |
|-----------------|--------|--------|------------------------|-----------|------------------------|-----------|
| Expt. #s        | Comp # | Comp.  | Expt.                  | Abs. Dev. | Expt.                  | Abs. Dev. |
| C17             | C9     | 47.61  | 43.8                   | 3.8       | 43.8                   | 3.8       |
| C1              | C2     | 65.73  | 60.7                   | 5.0       | 60.4                   | 5.3       |
| C15             | C15    | 85.57  | 87.5                   | 1.9       | 87.4                   | 1.8       |
| C18             | C16    | 24.82  | 26.2                   | 1.4       | 26.1                   | 1.3       |
| C19             | C1     | 16.01  | 17.3                   | 1.3       | 17.2                   | 1.2       |
| C13             | C3     | 133.89 | 137.5                  | 3.6       | 137.4                  | 3.5       |
| C11             | C8     | 139.77 | 136.1                  | 3.7       | 136.2                  | 3.6       |
| C4              | C12    | 132.73 | 131.0                  | 1.7       | 131.0                  | 1.7       |
| C10             | C4     | 123.54 | 124.6                  | 1.1       | 124.7                  | 1.2       |
| C8              | C10    | 115.88 | 108.6                  | 7.3       | 108.6                  | 7.3       |
| C9              | C7     | 156.62 | 160.9                  | 4.3       | 161.0                  | 4.4       |
| C14             | C11    | 103.51 | 113.3                  | 9.8       | 113.1                  | 9.6       |

|     |     |        |             |            |             |            |
|-----|-----|--------|-------------|------------|-------------|------------|
| C2  | C5  | 168.94 | 170.4       | 1.5        | 170.4       | 1.5        |
| C3  | C6  | 168.72 | 170.8       | 2.1        | 170.7       | 2.0        |
| C12 | C13 | 22.62  | 17.6        | 5.0        | 17.6        | 5.0        |
| C16 | C14 | 14.55  | 15.0        | 0.4        | 14.9        | 0.3        |
|     |     |        | <b>MAD:</b> | <b>3.4</b> | <b>MAD:</b> | <b>3.3</b> |

| <sup>1</sup> H |               |       | Isolation <sup>1</sup> |             | Synthesis <sup>2</sup> |             |
|----------------|---------------|-------|------------------------|-------------|------------------------|-------------|
| Expt. #s       | Comp #        | Comp. | Expt.                  | Abs. Dev.   | Expt.                  | Abs. Dev.   |
| C1             | H23           | 3.58  | 3.55                   | 0.03        | 3.51                   | 0.07        |
| C15            | H29           | 4.17  | 4.24                   | 0.07        | 4.21                   | 0.04        |
| C10            | H27           | 7.11  | 6.97                   | 0.14        | 6.95                   | 0.16        |
| C8             | H26           | 7.10  | 6.99                   | 0.11        | 6.93                   | 0.17        |
| -              | H24           |       | n.o.                   |             | n.o.                   |             |
| -              | H34           |       | n.o.                   |             | n.o.                   |             |
| C16            | ave(25,30,32) | 1.31  | 1.32                   | 0.01        | 1.28                   | 0.03        |
| C18            | ave(28,31,33) | 1.31  | 1.38                   | 0.07        | 1.36                   | 0.05        |
| C19            | ave(20-22)    | 1.37  | 1.32                   | 0.05        | 1.28                   | 0.09        |
| C12            | ave(17-19)    | 2.54  | 2.24                   | 0.30        | 2.38                   | 0.16        |
|                |               |       | <b>MAD:</b>            | <b>0.10</b> | <b>MAD:</b>            | <b>0.10</b> |

\*Literature reference for experimental data.

Compound 4 (Intermediate):

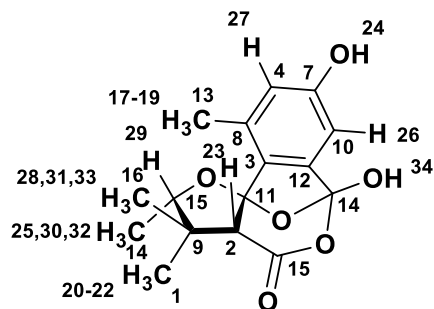

**Energy profiles** for the conformers found for compound **4**. The percent population is shown, with those included in the calculation highlighted in green. Data is sorted by relative Gibb's free energy.

| B3LYP/6-31G(d) |                       |              |
|----------------|-----------------------|--------------|
|                | $\Delta G$ (kcal/mol) | % population |
| 1.log          | 0.000                 | 60.5         |
| 2.log          | 0.284                 | 37.5         |
| 4.log          | 2.414                 | 0.9          |
| 3.log          | 2.484                 | 1.0          |

|       |        |
|-------|--------|
| 8.log | 127.76 |
|-------|--------|

**Computed chemical shifts** (ppm) for compound **4**. Values were obtained by scaling the calculated isotropic values of individual atoms, using the scaling factors noted in the method section. The chemical shifts shown are Boltzmann weighted average of the corresponding conformers. Mean absolute deviations (MADs) (between the computed and experimental numbers, ppm) maximum absolute deviations (MAXs) are also included.

| <sup>13</sup> C |        |        | Isolation <sup>1</sup> |            | Synthesis <sup>2</sup> |            |
|-----------------|--------|--------|------------------------|------------|------------------------|------------|
| Expt. #s        | Comp # | Comp.  | Expt.                  | Abs. Dev.  | Expt.                  | Abs. Dev.  |
| C17             | C9     | 47.67  | 43.8                   | 3.9        | 43.8                   | 3.9        |
| C1              | C2     | 61.87  | 60.7                   | 1.2        | 60.4                   | 1.5        |
| C15             | C15    | 88.07  | 87.5                   | 0.6        | 87.4                   | 0.7        |
| C18             | C16    | 24.64  | 26.2                   | 1.6        | 26.1                   | 1.5        |
| C19             | C1     | 16.70  | 17.3                   | 0.6        | 17.2                   | 0.5        |
| C13             | C3     | 131.18 | 137.5                  | 6.3        | 137.4                  | 6.2        |
| C11             | C8     | 137.48 | 136.1                  | 1.4        | 136.2                  | 1.3        |
| C4              | C12    | 140.46 | 131.0                  | 9.5        | 131.0                  | 9.5        |
| C10             | C4     | 118.33 | 124.6                  | 6.3        | 124.7                  | 6.4        |
| C8              | C10    | 104.43 | 108.6                  | 4.2        | 108.6                  | 4.2        |
| C9              | C7     | 158.21 | 160.9                  | 2.7        | 161.0                  | 2.8        |
| C14             | C11    | 112.38 | 113.3                  | 0.9        | 113.1                  | 0.7        |
| C2              | C5     | 17.75  | 17.6                   | 0.1        | 17.6                   | 0.1        |
| C3              | C6     | 116.66 | 170.8                  | 54.1       | 170.7                  | 54.0       |
| C12             | C13    | 173.61 | 170.4                  | 3.2        | 170.4                  | 3.2        |
| C16             | C14    | 13.99  | 15.0                   | 1.0        | 14.9                   | 0.9        |
|                 |        |        | <b>MAD:</b>            | <b>6.1</b> | <b>MAD:</b>            | <b>6.1</b> |

| <sup>1</sup> H |               |          | Isolation <sup>1</sup> |             | Synthesis <sup>2</sup> |             |
|----------------|---------------|----------|------------------------|-------------|------------------------|-------------|
| Expt. #s       | Comp #        | Comp.    | Expt.                  | Abs. Dev.   | Expt.                  | Abs. Dev.   |
| C1             | H23           | 3.27     | 3.55                   | 0.28        | 3.51                   | 0.24        |
| C15            | H29           | 4.46     | 4.24                   | 0.22        | 4.21                   | 0.25        |
| C10            | H27           | 6.84     | 6.97                   | 0.13        | 6.95                   | 0.11        |
| C8             | H26           | 6.93     | 6.99                   | 0.06        | 6.93                   | 0.00        |
| -              | H24           | 5.26     | n.o.                   |             | n.o.                   |             |
| -              | H34           | 4.06     | n.o.                   |             | n.o.                   |             |
| C16            | ave(25,30,32) | 1.33     | 1.32                   | 0.01        | 1.28                   | 0.05        |
| C18            | ave(28,31,33) | 1.18     | 1.38                   | 0.20        | 1.36                   | 0.18        |
| C19            | ave(20-22)    | 1.35     | 1.32                   | 0.03        | 1.28                   | 0.07        |
| C12            | ave(17-19)    | 2.398609 | 2.24                   | 0.16        | 2.38                   | 0.02        |
|                |               |          | <b>MAD:</b>            | <b>0.14</b> | <b>MAD:</b>            | <b>0.11</b> |

\*Literature reference for experimental data.

Compound 2 (Carboxylic Acid):

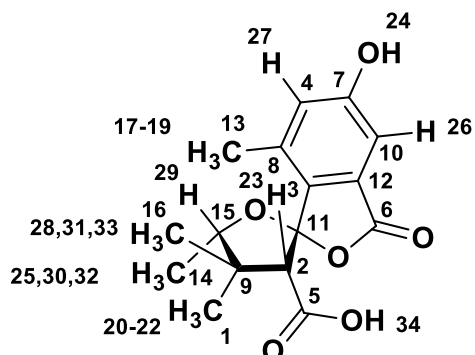

**Energy profiles** for the conformers found for compound **2**. The percent population is shown, with those included in the calculation highlighted in green. Data is sorted by relative Gibb's free energy.

| B3LYP/6-31G(d) |                       |              |
|----------------|-----------------------|--------------|
|                | $\Delta G$ (kcal/mol) | % population |
| 2.log          | 0.000                 | 51.3         |
| 1.log          | 0.491                 | 22.4         |
| 3.log          | 0.626                 | 17.8         |
| 4.log          | 1.295                 | 5.8          |
| 9.log          | 1.752                 | 2.7          |
| 10.log         | 2.331                 | 1.0          |
| 5.log          | 4.357                 |              |
| 14.log         | 4.890                 |              |
| 6.log          | 4.948                 |              |
| 16.log         | 5.636                 |              |
| 13.log         | 7.155                 |              |
| 15.log         | 7.919                 |              |

**Computed chemical shifts** (ppm) for compound **2**. Values were obtained by scaling the calculated isotropic values of individual atoms, using the scaling factors noted in the method section. The chemical shifts shown are Boltzmann weighted average of the corresponding conformers. Mean absolute deviations (MADs) (between the computed and experimental numbers, ppm) maximum absolute deviations (MAXs) are also included.

| <sup>13</sup> C |        |       | Isolation <sup>1</sup> |           | Synthesis <sup>2</sup> |           |
|-----------------|--------|-------|------------------------|-----------|------------------------|-----------|
| Expt. #s        | Comp # | Comp. | Expt.                  | Abs. Dev. | Expt.                  | Abs. Dev. |
| C17             | C9     | 16.05 | 17.3                   | 1.2       | 17.2                   | 1.1       |
| C1              | C2     | 58.95 | 60.7                   | 1.7       | 60.4                   | 1.4       |

|     |     |        |             |            |             |            |
|-----|-----|--------|-------------|------------|-------------|------------|
| C15 | C15 | 138.24 | 137.5       | 0.7        | 137.4       | 0.8        |
| C18 | C16 | 124.61 | 124.6       | 0.0        | 124.7       | 0.1        |
| C19 | C1  | 172.54 | 170.4       | 2.1        | 170.4       | 2.1        |
| C13 | C3  | 171.40 | 170.8       | 0.6        | 170.7       | 0.7        |
| C11 | C8  | 159.09 | 160.9       | 1.8        | 161.0       | 1.9        |
| C4  | C12 | 139.35 | 136.1       | 3.3        | 136.2       | 3.2        |
| C10 | C4  | 47.60  | 43.8        | 3.8        | 43.8        | 3.8        |
| C8  | C10 | 108.08 | 108.6       | 0.5        | 108.6       | 0.5        |
| C9  | C7  | 112.04 | 113.3       | 1.3        | 113.1       | 1.1        |
| C14 | C11 | 129.85 | 131.0       | 1.2        | 131.0       | 1.2        |
| C2  | C5  | 17.85  | 17.6        | 0.3        | 17.6        | 0.3        |
| C3  | C6  | 13.99  | 15.0        | 1.0        | 14.9        | 0.9        |
| C12 | C13 | 86.59  | 87.5        | 0.9        | 87.4        | 0.8        |
| C16 | C14 | 24.44  | 26.2        | 1.8        | 26.1        | 1.7        |
|     |     |        | <b>MAD:</b> | <b>1.4</b> | <b>MAD:</b> | <b>1.3</b> |

\*Literature reference for experimental data.

| <sup>1</sup> H |               |       | Isolation <sup>1</sup> |             | Synthesis <sup>2</sup> |             |
|----------------|---------------|-------|------------------------|-------------|------------------------|-------------|
| Expt. #s       | Comp #        | Comp. | Expt.                  | Abs. Dev.   | Expt.                  | Abs. Dev.   |
| C1             | H23           | 4.05  | 3.55                   | 0.50        | 3.51                   | 0.54        |
| C15            | H29           | 4.38  | 4.24                   | 0.14        | 4.21                   | 0.17        |
| C10            | H27           | 7.24  | 6.97                   | 0.27        | 6.95                   | 0.29        |
| C8             | H26           | 7.12  | 6.99                   | 0.13        | 6.93                   | 0.19        |
| -              | H24           | 5.42  | n.o.                   |             | n.o.                   |             |
| -              | H34           | 6.54  | n.o.                   |             | n.o.                   |             |
| C16            | ave(25,30,32) | 1.31  | 1.32                   | 0.01        | 1.28                   | 0.03        |
| C18            | ave(28,31,33) | 1.38  | 1.38                   | 0.00        | 1.36                   | 0.02        |
| C19            | ave(20-22)    | 1.40  | 1.32                   | 0.08        | 1.28                   | 0.12        |
| C12            | ave(17-19)    | 2.64  | 2.24                   | 0.40        | 2.38                   | 0.26        |
|                |               |       | <b>MAD:</b>            | <b>0.19</b> | <b>MAD:</b>            | <b>0.20</b> |

\*Literature reference for experimental data.

Deprotonated Compound 2 (Carboxylate):

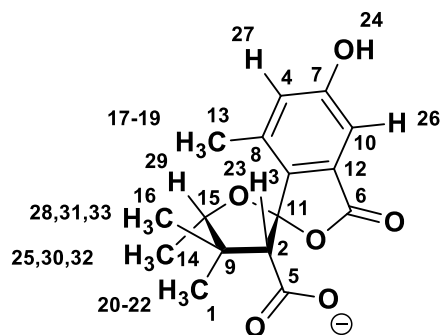

**Energy profiles** for the conformers found for deprotonated **2**. The percent population is shown, with those included in the calculation highlighted in green. Data is sorted by relative Gibb's free energy.

| B3LYP/6-31G(d) |                       |              |
|----------------|-----------------------|--------------|
|                | $\Delta G$ (kcal/mol) | % population |
| 2.log          | 0.000                 | 85.2         |
| 1.log          | 1.037                 | 14.8         |

**Computed chemical shifts** (ppm) for deprotonated **2**. Values were obtained by scaling the calculated isotropic values of individual atoms, using the scaling factors noted in the method section. The chemical shifts shown are Boltzmann weighted average of the corresponding conformers. Mean absolute deviations (MADs) (between the computed and experimental numbers, ppm) maximum absolute deviations (MAXs) are also included.

| <sup>13</sup> C |        |        | Isolation <sup>1</sup> |            | Synthesis <sup>2</sup> |            |
|-----------------|--------|--------|------------------------|------------|------------------------|------------|
| Expt. #s        | Comp # | Comp.  | Expt.                  | Abs. Dev.  | Expt.                  | Abs. Dev.  |
| C17             | C9     | 16.71  | 17.3                   | 0.6        | 17.2                   | 0.5        |
| C1              | C2     | 61.64  | 60.7                   | 0.9        | 60.4                   | 1.2        |
| C15             | C15    | 140.65 | 137.5                  | 3.2        | 137.4                  | 3.3        |
| C18             | C16    | 123.26 | 124.6                  | 1.3        | 124.7                  | 1.4        |
| C19             | C1     | 172.36 | 170.4                  | 2.0        | 170.4                  | 2.0        |
| C13             | C3     | 172.24 | 170.8                  | 1.4        | 170.7                  | 1.5        |
| C11             | C8     | 158.39 | 160.9                  | 2.5        | 161.0                  | 2.6        |
| C4              | C12    | 138.16 | 136.1                  | 2.1        | 136.2                  | 2.0        |
| C10             | C4     | 46.86  | 43.8                   | 3.1        | 43.8                   | 3.1        |
| C8              | C10    | 107.60 | 108.6                  | 1.0        | 108.6                  | 1.0        |
| C9              | C7     | 116.64 | 113.3                  | 3.3        | 113.1                  | 3.5        |
| C14             | C11    | 131.16 | 131.0                  | 0.2        | 131.0                  | 0.2        |
| C2              | C5     | 17.83  | 17.6                   | 0.2        | 17.6                   | 0.2        |
| C3              | C6     | 15.14  | 15.0                   | 0.1        | 14.9                   | 0.2        |
| C12             | C13    | 85.85  | 87.5                   | 1.6        | 87.4                   | 1.5        |
| C16             | C14    | 26.02  | 26.2                   | 0.2        | 26.1                   | 0.1        |
|                 |        |        | <b>MAD:</b>            | <b>1.5</b> | <b>MAD:</b>            | <b>1.5</b> |

\*Literature reference for experimental data.

| <sup>1</sup> H |        |       | Isolation <sup>1</sup> |           | Synthesis <sup>2</sup> |           |
|----------------|--------|-------|------------------------|-----------|------------------------|-----------|
| Expt. #s       | Comp # | Comp. | Expt.                  | Abs. Dev. | Expt.                  | Abs. Dev. |
| C1             | H23    | 3.66  | 3.55                   | 0.11      | 3.51                   | 0.15      |
| C15            | H29    | 4.23  | 4.24                   | 0.01      | 4.21                   | 0.02      |
| C10            | H27    | 7.18  | 6.97                   | 0.21      | 6.95                   | 0.23      |

|     |               |      |             |             |             |             |
|-----|---------------|------|-------------|-------------|-------------|-------------|
| C8  | H26           | 7.05 | 6.99        | 0.06        | 6.93        | 0.12        |
| -   | H24           | 5.23 | n.o.        |             | n.o.        |             |
| C16 | H34           | 1.29 | 1.32        | 0.03        | 1.28        | 0.01        |
| C18 | ave(25,30,32) | 1.47 | 1.38        | 0.09        | 1.36        | 0.11        |
| C19 | ave(28,31,33) | 1.42 | 1.32        | 0.10        | 1.28        | 0.14        |
| C12 | ave(20-22)    | 2.49 | 2.24        | 0.25        | 2.38        | 0.11        |
|     | ave(17-19)    |      | <b>MAD:</b> | <b>0.11</b> | <b>MAD:</b> | <b>0.11</b> |

\*Literature reference for experimental data.

### Computed chemical shifts for H-Bonding models:

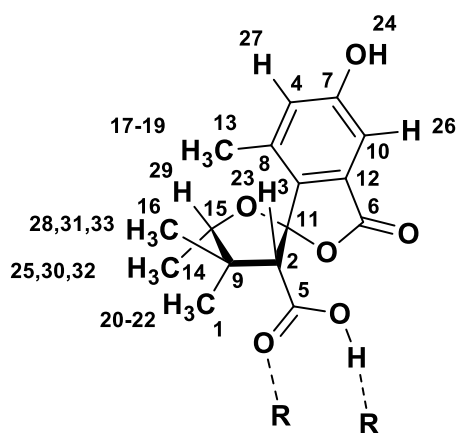

### H-bonds to water:

**Energy profiles** for the conformers found for water H-bonding model. The percent population is shown, with those included in the calculation highlighted in green. Data is sorted by relative Gibb's free energy.

| B3LYP/6-31G(d) |                       |              |
|----------------|-----------------------|--------------|
|                | $\Delta G$ (kcal/mol) | % population |
| water_up.log   | 0                     | 85.7         |
| water_down.log | 1.06173               | 14.3         |

**Computed chemical shifts** (ppm) for water H-bonding model. Values were obtained by scaling the calculated isotropic values of individual atoms, using the scaling factors noted in the method section. The chemical shifts shown are Boltzmann weighted average of the corresponding conformers. Mean absolute deviations (MADs) (between the computed and experimental numbers, ppm) maximum absolute deviations (MAXs) are also included.

### **Water up**

| <sup>13</sup> C |        |       | Isolation <sup>1</sup> |           | Synthesis <sup>2</sup> |           |
|-----------------|--------|-------|------------------------|-----------|------------------------|-----------|
| Expt. #s        | Comp # | Comp. | Expt.                  | Abs. Dev. | Expt.                  | Abs. Dev. |
| C17             | C9     | 15.25 | 17.3                   | 2.1       | 17.2                   | 2.0       |



|     |     |        |             |            |             |            |
|-----|-----|--------|-------------|------------|-------------|------------|
| C1  | C2  | 59.46  | 60.7        | 1.2        | 60.4        | 0.9        |
| C15 | C15 | 138.99 | 137.5       | 1.5        | 137.4       | 1.6        |
| C18 | C16 | 124.68 | 124.6       | 0.1        | 124.7       | 0.0        |
| C19 | C1  | 175.90 | 170.4       | 5.5        | 170.4       | 5.5        |
| C13 | C3  | 171.30 | 170.8       | 0.5        | 170.7       | 0.6        |
| C11 | C8  | 159.19 | 160.9       | 1.7        | 161.0       | 1.8        |
| C4  | C12 | 139.11 | 136.1       | 3.0        | 136.2       | 2.9        |
| C10 | C4  | 47.09  | 43.8        | 3.3        | 43.8        | 3.3        |
| C8  | C10 | 107.72 | 108.6       | 0.9        | 108.6       | 0.9        |
| C9  | C7  | 112.51 | 113.3       | 0.8        | 113.1       | 0.6        |
| C14 | C11 | 129.36 | 131.0       | 1.6        | 131.0       | 1.6        |
| C2  | C5  | 17.64  | 17.6        | 0.0        | 17.6        | 0.0        |
| C3  | C6  | 13.82  | 15.0        | 1.2        | 14.9        | 1.1        |
| C12 | C13 | 86.90  | 87.5        | 0.6        | 87.4        | 0.5        |
| C16 | C14 | 23.99  | 26.2        | 2.2        | 26.1        | 2.1        |
|     |     |        | <b>MAD:</b> | <b>1.6</b> | <b>MAD:</b> | <b>1.6</b> |

\*Literature reference for experimental data.

| <sup>1</sup> H |               |       | Isolation <sup>1</sup> |             | Synthesis <sup>2</sup> |             |
|----------------|---------------|-------|------------------------|-------------|------------------------|-------------|
| Expt. #s       | Comp #        | Comp. | Expt.                  | Abs. Dev.   | Expt.                  | Abs. Dev.   |
| C1             | H23           | 4.06  | 3.55                   | 0.5         | 3.51                   | 0.5         |
| C15            | H29           | 4.32  | 4.24                   | 0.1         | 4.21                   | 0.1         |
| C10            | H27           | 7.24  | 6.97                   | 0.3         | 6.95                   | 0.3         |
| C8             | H26           | 7.09  | 6.99                   | 0.1         | 6.93                   | 0.2         |
| -              | H24           | 5.39  | n.o.                   |             | n.o.                   |             |
| -              | H34           | 10.53 | n.o.                   |             | n.o.                   |             |
| C16            | ave(25,30,32) | 1.28  | 1.32                   | 0.0         | 1.28                   | 0.0         |
| C18            | ave(28,31,33) | 1.36  | 1.38                   | 0.0         | 1.36                   | 0.0         |
| C19            | ave(20-22)    | 1.42  | 1.32                   | 0.1         | 1.28                   | 0.1         |
| C12            | ave(17-19)    | 2.51  | 2.42                   | 0.1         | 2.38                   | 0.1         |
|                |               |       | <b>MAD:</b>            | <b>0.15</b> | <b>MAD:</b>            | <b>0.17</b> |

\*Literature reference for experimental data.

### Water down

| <sup>13</sup> C |        |        | Isolation <sup>1</sup> |           | Synthesis <sup>2</sup> |           |
|-----------------|--------|--------|------------------------|-----------|------------------------|-----------|
| Expt. #s        | Comp # | Comp.  | Expt.                  | Abs. Dev. | Expt.                  | Abs. Dev. |
| C17             | C9     | 15.02  | 17.3                   | 2.3       | 17.2                   | 2.2       |
| C1              | C2     | 59.54  | 60.7                   | 1.2       | 60.4                   | 0.9       |
| C15             | C15    | 139.28 | 137.5                  | 1.8       | 137.4                  | 1.9       |
| C18             | C16    | 124.69 | 124.6                  | 0.1       | 124.7                  | 0.0       |

|     |     |        |             |            |             |            |
|-----|-----|--------|-------------|------------|-------------|------------|
| C19 | C1  | 173.01 | 170.4       | 2.6        | 170.4       | 2.6        |
| C13 | C3  | 173.38 | 170.8       | 2.6        | 170.7       | 2.7        |
| C11 | C8  | 158.94 | 160.9       | 2.0        | 161.0       | 2.1        |
| C4  | C12 | 139.15 | 136.1       | 3.1        | 136.2       | 3.0        |
| C10 | C4  | 46.07  | 43.8        | 2.3        | 43.8        | 2.3        |
| C8  | C10 | 107.45 | 108.6       | 1.2        | 108.6       | 1.2        |
| C9  | C7  | 114.41 | 113.3       | 1.1        | 113.1       | 1.3        |
| C14 | C11 | 130.49 | 131.0       | 0.5        | 131.0       | 0.5        |
| C2  | C5  | 18.21  | 17.6        | 0.6        | 17.6        | 0.6        |
| C3  | C6  | 13.57  | 15.0        | 1.4        | 14.9        | 1.3        |
| C12 | C13 | 86.96  | 87.5        | 0.5        | 87.4        | 0.4        |
| C16 | C14 | 22.36  | 26.2        | 3.8        | 26.1        | 3.7        |
|     |     |        | <b>MAD:</b> | <b>1.7</b> | <b>MAD:</b> | <b>1.7</b> |

\*Literature reference for experimental data.

| <sup>1</sup> H |               |       | Isolation <sup>1</sup> |             | Synthesis <sup>2</sup> |             |
|----------------|---------------|-------|------------------------|-------------|------------------------|-------------|
| Expt. #s       | Comp #        | Comp. | Expt.                  | Abs. Dev.   | Expt.                  | Abs. Dev.   |
| C1             | H23           | 3.93  | 3.55                   | 0.4         | 3.51                   | 0.4         |
| C15            | H29           | 4.37  | 4.24                   | 0.1         | 4.21                   | 0.2         |
| C10            | H27           | 7.26  | 6.97                   | 0.3         | 6.95                   | 0.3         |
| C8             | H26           | 7.12  | 6.99                   | 0.1         | 6.93                   | 0.2         |
| -              | H24           | 5.43  | n.o.                   |             | n.o.                   |             |
| -              | H34           | 9.43  | n.o.                   |             | n.o.                   |             |
| C16            | ave(25,30,32) | 1.29  | 1.32                   | 0.0         | 1.28                   | 0.0         |
| C18            | ave(28,31,33) | 1.29  | 1.38                   | 0.1         | 1.36                   | 0.1         |
| C19            | ave(20-22)    | 1.38  | 1.32                   | 0.1         | 1.28                   | 0.1         |
| C12            | ave(17-19)    | 2.50  | 2.42                   | 0.1         | 2.38                   | 0.1         |
|                |               |       | <b>MAD:</b>            | <b>0.15</b> | <b>MAD:</b>            | <b>0.17</b> |

\*Literature reference for experimental data.

H-bonds to methanol:

**Energy profiles** for the conformers found for methanol H-bonding model. The percent population is shown, with those included in the calculation highlighted in green. Data is sorted by relative Gibb's free energy.

| B3LYP/6-31G(d)    |                       |              |
|-------------------|-----------------------|--------------|
|                   | $\Delta G$ (kcal/mol) | % population |
| methanol_up.log   | 0                     | 95.1         |
| methanol_down.log | 1.763275              | 4.9          |

**Computed chemical shifts** (ppm) for compound methanol H-bonding model. Values were obtained by scaling the calculated isotropic values of individual atoms, using the scaling factors noted in the method section. The chemical shifts shown are Boltzmann weighted average of the corresponding conformers. Mean absolute deviations (MADs) (between the computed and experimental numbers, ppm) maximum absolute deviations (MAXs) are also included.

### MeOH up

| <sup>13</sup> C |        |        | Isolation <sup>1</sup> |             | Synthesis <sup>2</sup> |             |
|-----------------|--------|--------|------------------------|-------------|------------------------|-------------|
| Expt. #s        | Comp # | Comp.  | Expt.                  | Abs. Dev.   | Expt.                  | Abs. Dev.   |
| C17             | C9     | 10.60  | 17.3                   | 6.7         | 17.2                   | 6.6         |
| C1              | C2     | 53.14  | 60.7                   | 7.6         | 60.4                   | 7.3         |
| C15             | C15    | 126.51 | 137.5                  | 11.0        | 137.4                  | 10.9        |
| C18             | C16    | 109.70 | 124.6                  | 14.9        | 124.7                  | 15.0        |
| C19             | C1     | 159.45 | 170.4                  | 10.9        | 170.4                  | 10.9        |
| C13             | C3     | 154.76 | 170.8                  | 16.0        | 170.7                  | 15.9        |
| C11             | C8     | 143.72 | 160.9                  | 17.2        | 161.0                  | 17.3        |
| C4              | C12    | 125.64 | 136.1                  | 10.5        | 136.2                  | 10.6        |
| C10             | C4     | 40.76  | 43.8                   | 3.0         | 43.8                   | 3.0         |
| C8              | C10    | 93.96  | 108.6                  | 14.6        | 108.6                  | 14.6        |
| C9              | C7     | 103.63 | 113.3                  | 9.7         | 113.1                  | 9.5         |
| C14             | C11    | 116.64 | 131.0                  | 14.4        | 131.0                  | 14.4        |
| C2              | C5     | 12.41  | 17.6                   | 5.2         | 17.6                   | 5.2         |
| C3              | C6     | 9.32   | 15.0                   | 5.7         | 14.9                   | 5.6         |
| C12             | C13    | 78.40  | 87.5                   | 9.1         | 87.4                   | 9.0         |
| C16             | C14    | 18.38  | 26.2                   | 7.8         | 26.1                   | 7.7         |
|                 |        |        | <b>MAD:</b>            | <b>10.3</b> | <b>MAD:</b>            | <b>10.2</b> |

\*Literature reference for experimental data.

| <sup>1</sup> H |               |       | Isolation <sup>1</sup> |             | Synthesis <sup>2</sup> |             |
|----------------|---------------|-------|------------------------|-------------|------------------------|-------------|
| Expt. #s       | Comp #        | Comp. | Expt.                  | Abs. Dev.   | Expt.                  | Abs. Dev.   |
| C1             | H23           | 4.02  | 3.55                   | 0.5         | 3.51                   | 0.5         |
| C15            | H29           | 4.31  | 4.24                   | 0.1         | 4.21                   | 0.1         |
| C10            | H27           | 7.09  | 6.97                   | 0.1         | 6.95                   | 0.1         |
| C8             | H26           | 7.04  | 6.99                   | 0.0         | 6.93                   | 0.1         |
| -              | H24           | 5.07  | n.o.                   |             | n.o.                   |             |
| -              | H34           | 10.90 | n.o.                   |             | n.o.                   |             |
| C16            | ave(25,30,32) | 1.32  | 1.32                   | 0.0         | 1.28                   | 0.0         |
| C18            | ave(28,31,33) | 1.39  | 1.38                   | 0.0         | 1.36                   | 0.0         |
| C19            | ave(20-22)    | 1.46  | 1.32                   | 0.1         | 1.28                   | 0.2         |
| C12            | ave(17-19)    | 2.53  | 2.42                   | 0.1         | 2.38                   | 0.1         |
|                |               |       | <b>MAD:</b>            | <b>0.12</b> | <b>MAD:</b>            | <b>0.16</b> |

MeOH down

| <sup>13</sup> C |        |        | Isolation <sup>1</sup> |             | Synthesis <sup>2</sup> |             |
|-----------------|--------|--------|------------------------|-------------|------------------------|-------------|
| Expt. #s        | Comp # | Comp.  | Expt.                  | Abs. Dev.   | Expt.                  | Abs. Dev.   |
| C17             | C9     | 10.18  | 17.3                   | 7.1         | 17.2                   | 7.0         |
| C1              | C2     | 53.05  | 60.7                   | 7.7         | 60.4                   | 7.4         |
| C15             | C15    | 126.58 | 137.5                  | 10.9        | 137.4                  | 10.8        |
| C18             | C16    | 109.98 | 124.6                  | 14.6        | 124.7                  | 14.7        |
| C19             | C1     | 155.64 | 170.4                  | 14.8        | 170.4                  | 14.8        |
| C13             | C3     | 156.83 | 170.8                  | 14.0        | 170.7                  | 13.9        |
| C11             | C8     | 143.75 | 160.9                  | 17.1        | 161.0                  | 17.2        |
| C4              | C12    | 125.40 | 136.1                  | 10.7        | 136.2                  | 10.8        |
| C10             | C4     | 40.88  | 43.8                   | 2.9         | 43.8                   | 2.9         |
| C8              | C10    | 93.48  | 108.6                  | 15.1        | 108.6                  | 15.1        |
| C9              | C7     | 105.24 | 113.3                  | 8.1         | 113.1                  | 7.9         |
| C14             | C11    | 118.03 | 131.0                  | 13.0        | 131.0                  | 13.0        |
| C2              | C5     | 12.72  | 17.6                   | 4.9         | 17.6                   | 4.9         |
| C3              | C6     | 9.00   | 15.0                   | 6.0         | 14.9                   | 5.9         |
| C12             | C13    | 79.41  | 87.5                   | 8.1         | 87.4                   | 8.0         |
| C16             | C14    | 17.41  | 26.2                   | 8.8         | 26.1                   | 8.7         |
|                 |        |        | <b>MAD:</b>            | <b>10.2</b> | <b>MAD:</b>            | <b>10.2</b> |

\*Literature reference for experimental data.

| <sup>1</sup> H |               |       | Isolation <sup>1</sup> |             | Synthesis <sup>2</sup> |             |
|----------------|---------------|-------|------------------------|-------------|------------------------|-------------|
| Expt. #s       | Comp #        | Comp. | Expt.                  | Abs. Dev.   | Expt.                  | Abs. Dev.   |
| C1             | H23           | 3.84  | 3.55                   | 0.29        | 3.51                   | 0.33        |
| C15            | H29           | 4.31  | 4.24                   | 0.07        | 4.21                   | 0.10        |
| C10            | H27           | 7.10  | 6.97                   | 0.13        | 6.95                   | 0.15        |
| C8             | H26           | 7.00  | 6.99                   | 0.01        | 6.93                   | 0.07        |
| -              | H24           | 5.09  | n.o.                   |             | n.o.                   |             |
| -              | H34           | 9.59  | n.o.                   |             | n.o.                   |             |
| C16            | ave(25,30,32) | 1.38  | 1.32                   | 0.06        | 1.28                   | 0.10        |
| C18            | ave(28,31,33) | 1.34  | 1.38                   | 0.04        | 1.36                   | 0.02        |
| C19            | ave(20-22)    | 1.47  | 1.32                   | 0.15        | 1.28                   | 0.19        |
| C12            | ave(17-19)    | 2.53  | 2.42                   | 0.11        | 2.38                   | 0.15        |
|                |               |       | <b>MAD:</b>            | <b>0.11</b> | <b>MAD:</b>            | <b>0.14</b> |

\*Literature reference for experimental data.

Dimer model:

**Computed chemical shifts** (ppm) for dimer model. Values were obtained by scaling the calculated isotropic values of individual atoms, using the scaling factors noted in the method section. The chemical shifts shown are Boltzmann weighted average of the corresponding conformers. Mean absolute deviations (MADs) (between the computed and experimental numbers, ppm) maximum absolute deviations (MAXs) are also included.

| <sup>13</sup> C |        |        | Isolation <sup>1</sup> |            | Synthesis <sup>2</sup> |            |
|-----------------|--------|--------|------------------------|------------|------------------------|------------|
| Expt. #s        | Comp # | Comp.  | Expt.                  | Abs. Dev.  | Expt.                  | Abs. Dev.  |
| C17             | C9     | 15.21  | 17.3                   | 2.1        | 17.2                   | 2.0        |
| C1              | C2     | 59.42  | 60.7                   | 1.3        | 60.4                   | 1.0        |
| C15             | C15    | 138.77 | 137.5                  | 1.3        | 137.4                  | 1.4        |
| C18             | C16    | 124.83 | 124.6                  | 0.2        | 124.7                  | 0.1        |
| C19             | C1     | 178.27 | 170.4                  | 7.9        | 170.4                  | 7.9        |
| C13             | C3     | 171.48 | 170.8                  | 0.7        | 170.7                  | 0.8        |
| C11             | C8     | 159.30 | 160.9                  | 1.6        | 161.0                  | 1.7        |
| C4              | C12    | 139.42 | 136.1                  | 3.3        | 136.2                  | 3.2        |
| C10             | C4     | 46.41  | 43.8                   | 2.6        | 43.8                   | 2.6        |
| C8              | C10    | 107.94 | 108.6                  | 0.7        | 108.6                  | 0.7        |
| C9              | C7     | 112.03 | 113.3                  | 1.3        | 113.1                  | 1.1        |
| C14             | C11    | 128.55 | 131.0                  | 2.4        | 131.0                  | 2.4        |
| C2              | C5     | 17.83  | 17.6                   | 0.2        | 17.6                   | 0.2        |
| C3              | C6     | 13.65  | 15.0                   | 1.4        | 14.9                   | 1.3        |
| C12             | C13    | 86.77  | 87.5                   | 0.7        | 87.4                   | 0.6        |
| C16             | C14    | 23.55  | 26.2                   | 2.7        | 26.1                   | 2.6        |
|                 |        |        | <b>MAD:</b>            | <b>1.9</b> | <b>MAD:</b>            | <b>1.8</b> |

\*Literature reference for experimental data.

| <sup>1</sup> H |               |       | Isolation <sup>1</sup> |             | Synthesis <sup>2</sup> |             |
|----------------|---------------|-------|------------------------|-------------|------------------------|-------------|
| Expt. #s       | Comp #        | Comp. | Expt.                  | Abs. Dev.   | Expt.                  | Abs. Dev.   |
| C1             | H23           | 4.11  | 3.55                   | 0.6         | 3.51                   | 0.6         |
| C15            | H29           | 4.38  | 4.24                   | 0.1         | 4.21                   | 0.2         |
| C10            | H27           | 7.17  | 6.97                   | 0.2         | 6.95                   | 0.2         |
| C8             | H26           | 7.01  | 6.99                   | 0.0         | 6.93                   | 0.1         |
| -              | H24           | 5.32  | n.o.                   |             | n.o.                   |             |
| -              | H34           | 12.41 | n.o.                   |             | n.o.                   |             |
| C16            | ave(25,30,32) | 1.28  | 1.32                   | 0.0         | 1.28                   | 0.0         |
| C18            | ave(28,31,33) | 1.36  | 1.38                   | 0.0         | 1.36                   | 0.0         |
| C19            | ave(20-22)    | 1.41  | 1.32                   | 0.1         | 1.28                   | 0.1         |
| C12            | ave(17-19)    | 2.48  | 2.42                   | 0.1         | 2.38                   | 0.1         |
|                |               |       | <b>MAD:</b>            | <b>0.14</b> | <b>MAD:</b>            | <b>0.16</b> |

Dimer:

**Computed chemical shifts** (ppm) for dimer. Values were obtained by scaling the calculated isotropic values of individual atoms, using the scaling factors noted in the method section. The chemical shifts shown are Boltzmann weighted average of the corresponding conformers. Mean absolute deviations (MADs) (between the computed and experimental numbers, ppm) maximum absolute deviations (MAXs) are also included.

| <sup>13</sup> C |        |        | Isolation <sup>1</sup> |            | Synthesis <sup>2</sup> |            |
|-----------------|--------|--------|------------------------|------------|------------------------|------------|
| Expt. #s        | Comp # | Comp.  | Expt.                  | Abs. Dev.  | Expt.                  | Abs. Dev.  |
| C17             | C9     | 15.81  | 17.3                   | 1.5        | 17.2                   | 1.4        |
| C1              | C2     | 59.43  | 60.7                   | 1.3        | 60.4                   | 1.0        |
| C15             | C15    | 138.68 | 137.5                  | 1.2        | 137.4                  | 1.3        |
| C18             | C16    | 124.88 | 124.6                  | 0.3        | 124.7                  | 0.2        |
| C19             | C1     | 178.42 | 170.4                  | 8.0        | 170.4                  | 8.0        |
| C13             | C3     | 171.36 | 170.8                  | 0.6        | 170.7                  | 0.7        |
| C11             | C8     | 159.08 | 160.9                  | 1.8        | 161.0                  | 1.9        |
| C4              | C12    | 139.09 | 136.1                  | 3.0        | 136.2                  | 2.9        |
| C10             | C4     | 46.85  | 43.8                   | 3.1        | 43.8                   | 3.1        |
| C8              | C10    | 108.10 | 108.6                  | 0.5        | 108.6                  | 0.5        |
| C9              | C7     | 111.74 | 113.3                  | 1.6        | 113.1                  | 1.4        |
| C14             | C11    | 128.98 | 131.0                  | 2.0        | 131.0                  | 2.0        |
| C2              | C5     | 17.49  | 17.6                   | 0.1        | 17.6                   | 0.1        |
| C3              | C6     | 14.08  | 15.0                   | 0.9        | 14.9                   | 0.8        |
| C12             | C13    | 86.80  | 87.5                   | 0.7        | 87.4                   | 0.6        |
| C16             | C14    | 23.89  | 26.2                   | 2.3        | 26.1                   | 2.2        |
|                 |        |        | <b>MAD:</b>            | <b>1.8</b> | <b>MAD:</b>            | <b>1.7</b> |

\*Literature reference for experimental data.

| <sup>1</sup> H |               |       | Isolation <sup>1</sup> |             | Synthesis <sup>2</sup> |             |
|----------------|---------------|-------|------------------------|-------------|------------------------|-------------|
| Expt. #s       | Comp #        | Comp. | Expt.                  | Abs. Dev.   | Expt.                  | Abs. Dev.   |
| C1             | H23           | 4.02  | 3.55                   | 0.47        | 3.51                   | 0.51        |
| C15            | H29           | 4.30  | 4.24                   | 0.1         | 4.21                   | 0.1         |
| C10            | H27           | 7.26  | 6.97                   | 0.3         | 6.95                   | 0.3         |
| C8             | H26           | 7.05  | 6.99                   | 0.1         | 6.93                   | 0.1         |
| -              | H24           | 5.35  | n.o.                   |             | n.o.                   |             |
| -              | H34           | 12.49 | n.o.                   |             | n.o.                   |             |
| C16            | ave(25,30,32) | 1.24  | 1.32                   | 0.1         | 1.28                   | 0.0         |
| C18            | ave(28,31,33) | 1.30  | 1.38                   | 0.1         | 1.36                   | 0.1         |
| C19            | ave(20-22)    | 1.36  | 1.32                   | 0.0         | 1.28                   | 0.1         |
| C12            | ave(17-19)    | 2.49  | 2.42                   | 0.1         | 2.38                   | 0.1         |
|                |               |       | <b>MAD:</b>            | <b>0.14</b> | <b>MAD:</b>            | <b>0.17</b> |

\*Literature reference for experimental data.

Carboxylate-acid complex:

**Computed chemical shifts** (ppm) for carboxylate-acid complex. Values were obtained by scaling the calculated isotropic values of individual atoms, using the scaling factors noted in the method section. The chemical shifts shown are Boltzmann weighted average of the corresponding conformers. Mean absolute deviations (MADs) (between the computed and experimental numbers, ppm) maximum absolute deviations (MAXs) are also included.

| <sup>13</sup> C |        |        | Isolation <sup>1</sup> |            | Synthesis <sup>2</sup> |            |
|-----------------|--------|--------|------------------------|------------|------------------------|------------|
| Expt. #s        | Comp # | Comp.  | Expt.                  | Abs. Dev.  | Expt.                  | Abs. Dev.  |
| 19              | C17    | 21.25  | 17.3                   | 4.0        | 17.2                   | 4.1        |
| 1               | C1     | 60.31  | 60.7                   | 0.4        | 60.4                   | 0.1        |
| 13              | C15    | 139.16 | 137.5                  | 1.7        | 137.4                  | 1.8        |
| 10              | C18    | 123.30 | 124.6                  | 1.3        | 124.7                  | 1.4        |
| 2               | C19    | 174.15 | 170.4                  | 3.7        | 170.4                  | 3.7        |
| 3               | C13    | 171.95 | 170.8                  | 1.2        | 170.7                  | 1.3        |
| 9               | C11    | 158.00 | 160.9                  | 2.9        | 161.0                  | 3.0        |
| 11              | C4     | 139.76 | 136.1                  | 3.7        | 136.2                  | 3.6        |
| 17              | C10    | 46.27  | 43.8                   | 2.5        | 43.8                   | 2.5        |
| 8               | C8     | 107.84 | 108.6                  | 0.8        | 108.6                  | 0.8        |
| 14              | C9     | 114.72 | 113.3                  | 1.4        | 113.1                  | 1.6        |
| 4               | C14    | 130.33 | 131.0                  | 0.7        | 131.0                  | 0.7        |
| 12              | C2     | 17.71  | 17.6                   | 0.1        | 17.6                   | 0.1        |
| 16              | C3     | 15.44  | 15.0                   | 0.4        | 14.9                   | 0.5        |
| 15              | C12    | 86.59  | 87.5                   | 0.9        | 87.4                   | 0.8        |
| 18              | C16    | 21.09  | 26.2                   | 5.1        | 26.1                   | 5.0        |
|                 |        |        | <b>MAD:</b>            | <b>1.9</b> | <b>MAD:</b>            | <b>1.9</b> |

\*Literature reference for experimental data.

| <sup>1</sup> H |               |       | Isolation <sup>1</sup> |             | Synthesis <sup>2</sup> |             |
|----------------|---------------|-------|------------------------|-------------|------------------------|-------------|
| Expt. #s       | Comp #        | Comp. | Expt.                  | Abs. Dev.   | Expt.                  | Abs. Dev.   |
| C1             | H23           | 3.80  | 3.55                   | 0.25        | 3.51                   | 0.29        |
| C15            | H29           | 4.31  | 4.24                   | 0.07        | 4.21                   | 0.10        |
| C10            | H27           | 7.10  | 6.97                   | 0.13        | 6.95                   | 0.15        |
| C8             | H26           | 7.02  | 6.99                   | 0.03        | 6.93                   | 0.09        |
| -              | H24           | 5.49  | n.o.                   |             | n.o.                   |             |
| -              | H34           | 11.21 | n.o.                   |             | n.o.                   |             |
| C16            | ave(25,30,32) | 1.23  | 1.32                   | 0.09        | 1.28                   | 0.05        |
| C18            | ave(28,31,33) | 1.37  | 1.38                   | 0.01        | 1.36                   | 0.01        |
| C19            | ave(20-22)    | 1.44  | 1.32                   | 0.12        | 1.28                   | 0.16        |
| C12            | ave(17-19)    | 2.46  | 2.42                   | 0.04        | 2.38                   | 0.08        |
|                |               |       | <b>MAD:</b>            | <b>0.09</b> | <b>MAD:</b>            | <b>0.12</b> |

\*Literature reference for experimental data.

## Computed Chemical Shifts (ppm) for Acetic Acid-Based Systems:

Values were obtained by scaling the calculated isotropic values of individual atoms, using the scaling factors noted in the method section. Deviations are explored for the carbonyl carbon. The chemical shifts shown for diacetate are Boltzmann weighted average of the corresponding conformers.

|         |           | Isotropic       | Shift        | Averaged | Reported <sup>3-4</sup> | Difference  |
|---------|-----------|-----------------|--------------|----------|-------------------------|-------------|
| Acetate | <b>1C</b> | <b>0.2520</b>   | <b>180.6</b> |          | <b>182.6</b>            | <b>2.0</b>  |
|         | <b>2C</b> | <b>158.6328</b> | <b>26.4</b>  |          | <b>24.9</b>             | <b>-1.5</b> |
|         | 3O        | 5.1169          | -            |          |                         |             |
|         | 4O        | 21.1203         | -            |          |                         |             |
|         | 5H        | 29.5719         | 2.14         | 1.98     | 1.80                    | -0.18       |
|         | 6H        | 29.5720         | 2.14         |          |                         |             |
|         | 7H        | 30.1019         | 1.65         |          |                         |             |

|             |           | Isotropic       | Shift        | Averaged | Reported <sup>3,5</sup> | Difference  |
|-------------|-----------|-----------------|--------------|----------|-------------------------|-------------|
| Acetic Acid | <b>1C</b> | <b>1.9432</b>   | <b>178.9</b> |          | <b>178.1</b>            | <b>-0.8</b> |
|             | <b>2C</b> | <b>165.7104</b> | <b>19.5</b>  |          | <b>22.0</b>             | <b>2.5</b>  |
|             | 3O        | -61.2251        | -            |          |                         |             |
|             | 4O        | 115.2616        | -            |          |                         |             |
|             | 5H        | 24.7770         | 6.6          |          |                         |             |
|             | 6H        | 29.2433         | 2.45         | 2.25     | 2.08                    | -0.17       |
|             | 7H        | 29.2433         | 2.45         |          |                         |             |
|             | 8H        | 29.8746         | 1.86         |          |                         |             |

| Biacetate   | Isotropic       | Isotropic       | Shift        | Shift        | Averaged     | Reported <sup>6</sup> | Difference  |
|-------------|-----------------|-----------------|--------------|--------------|--------------|-----------------------|-------------|
|             | Conf_1          | Conf_2          | Conf_1       | Conf_2       |              |                       |             |
| E(kcal/mol) | 0               | 2.0048625       |              |              |              |                       |             |
| <b>1 C</b>  | <b>-0.1413</b>  | <b>-0.3938</b>  | <b>180.9</b> | <b>181.2</b> | <b>181.3</b> | <b>180.2</b>          | <b>-1.1</b> |
| <b>2 C</b>  | <b>161.0401</b> | <b>159.888</b>  | <b>24.1</b>  | <b>25.2</b>  | <b>24.4</b>  |                       |             |
| <b>3 C</b>  | <b>-0.8501</b>  | <b>-0.8136</b>  | <b>181.6</b> | <b>181.6</b> |              |                       |             |
| <b>4 C</b>  | <b>160.4052</b> | <b>159.7281</b> | <b>24.7</b>  | <b>25.4</b>  |              |                       |             |
| 5 O         | -28.6268        | -5.8805         |              |              |              |                       |             |
| 6 O         | 61.8756         | 20.0211         |              |              |              |                       |             |
| 7 O         | -18.0544        | -44.2923        |              |              |              |                       |             |
| 8 O         | 41.5098         | 80.2739         |              |              |              |                       |             |
| 9 H         | 11.4201         | 14.5844         |              |              |              |                       |             |



|      |         |         |  |  |  |  |  |
|------|---------|---------|--|--|--|--|--|
| 10 H | 29.4106 | 29.5627 |  |  |  |  |  |
| 11 H | 29.4782 | 29.9739 |  |  |  |  |  |
| 12 H | 30.0744 | 29.5627 |  |  |  |  |  |
| 13 H | 29.448  | 28.9227 |  |  |  |  |  |
| 14 H | 29.5238 | 28.9227 |  |  |  |  |  |
| 15 H | 30.1044 | 29.7839 |  |  |  |  |  |

### Computed Chemical Shifts (ppm) for Propanoic Acid-Based Systems:

Values were obtained by scaling the calculated isotropic values of individual atoms, using the scaling factors noted in the method section. The chemical shifts shown are Boltzmann weighted average of the corresponding conformers.

| Propanoic Acid | Isotropic<br>Conf_1 | Isotropic<br>Conf_2 | Shift        | Shift        | Averaged     | Reported <sup>3,7</sup> | Difference  |
|----------------|---------------------|---------------------|--------------|--------------|--------------|-------------------------|-------------|
| E (kcal/mol)   | 0.00                | 0.90                |              |              |              |                         |             |
| <b>1C</b>      | <b>-1.1</b>         | <b>-1.3</b>         | <b>181.9</b> | <b>182.0</b> | <b>181.9</b> | <b>181.3</b>            | <b>-0.6</b> |
| <b>2C</b>      | <b>157.4</b>        | <b>154.4</b>        | <b>27.6</b>  | <b>30.6</b>  | <b>28.1</b>  | <b>28.7</b>             | <b>0.6</b>  |
| <b>3C</b>      | <b>178.6</b>        | <b>174.4</b>        | <b>7.0</b>   | <b>11.0</b>  | <b>7.7</b>   | <b>9.9</b>              | <b>2.2</b>  |
| 4O             | -52.2               | -57.3               | -            | -            | -            |                         |             |
| 5O             | 119.6               | 118.0               | -            | -            | -            |                         |             |
| 6H             | 24.7                | 24.8                | 6.68         | 6.65         |              |                         |             |
| 7H             | 28.9                | 29.5                | 2.73         | 2.24         | 2.68         | 2.38                    | -0.30       |
| 8H             | 28.9                | 29.0                | 2.73         | 2.71         |              |                         |             |
| 9H             | 30.7                | 30.4                | 1.09         | 1.38         | 1.15         | 1.16                    | 0.01        |
| 10H            | 30.7                | 30.3                | 1.11         | 1.44         |              |                         |             |
| 11H            | 30.7                | 30.5                | 1.11         | 1.28         |              |                         |             |

|            |           | Isotropic    | Shift        | Averaged | Reported <sup>3,8</sup> | Difference  |
|------------|-----------|--------------|--------------|----------|-------------------------|-------------|
| Propanoate | <b>1C</b> | <b>-2.1</b>  | <b>182.8</b> |          | <b>186.0</b>            | <b>3.2</b>  |
|            | <b>2C</b> | <b>151.5</b> | <b>33.4</b>  |          | <b>32.2</b>             | <b>-1.2</b> |
|            | <b>3C</b> | <b>175.0</b> | <b>10.5</b>  |          | <b>11.7</b>             | <b>1.2</b>  |
|            | 4O        | 19.9         | -            |          |                         |             |
|            | 5O        | 30.8         | -            |          |                         |             |
|            | 6H        | 29.4         | 2.27         | 2.27     | 2.18                    | -0.09       |
|            | 7H        | 29.4         | 2.27         |          |                         |             |
|            | 8H        | 30.7         | 1.09         | 1.04     | 1.06                    | 0.02        |
|            | 9H        | 30.8         | 1.02         |          |                         |             |

|  |     |      |      |  |  |
|--|-----|------|------|--|--|
|  | 10H | 30.8 | 1.02 |  |  |
|--|-----|------|------|--|--|

Energy Comparison for B3LYP – D3 Optimizations:

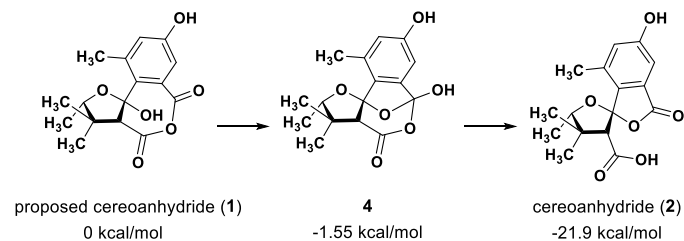

NMR Shift Table for B3LYP – D3 Optimizations:

| Atom Label | Exp. $\delta$       | Anhydride (1) $\delta$ | Abs. Dev.  | Acid (2) $\delta$ | Abs. Dev.   | Carboxylate $\delta$ | Abs. Dev. |
|------------|---------------------|------------------------|------------|-------------------|-------------|----------------------|-----------|
| C6         | 170.7               | 168.8                  | 1.9        | 168.6             | 2.1         | 172.2                | 1.5       |
| C5         | 170.4               | 168.7                  | 1.7        | 170.1             | 0.3         | 172.6                | 2.2       |
| C7         | 161.0               | 156.8                  | 4.2        | 156.8             | 4.2         | 158.4                | 2.6       |
| C3         | 137.4               | 133.8                  | 3.6        | 135.7             | 1.7         | 140.3                | 2.9       |
| C8         | 136.2               | 140.0                  | 3.8        | 136.8             | 0.6         | 137.5                | 1.3       |
| C12        | 131.0               | 132.2                  | 1.2        | 127.4             | 3.6         | 131.6                | 0.6       |
| C4         | 124.7               | 123.4                  | 1.3        | 122.5             | 2.2         | 122.7                | 2.0       |
| C11        | 113.1               | 103.2                  | <b>9.9</b> | 109.9             | 3.2         | 115.6                | 2.5       |
| C10        | 108.6               | 115.6                  | <b>7.0</b> | 106.5             | 2.1         | 107.6                | 1.0       |
| C15        | 87.4                | 85.0                   | 2.4        | 85.2              | 2.2         | 85.5                 | 1.9       |
| C2         | 60.4                | 65.4                   | 5.0        | 58.4              | 2.0         | 60.9                 | 0.5       |
| C9         | 43.8                | 46.7                   | 2.9        | 46.8              | 3.0         | 46.5                 | 2.7       |
| C16        | 26.1                | 24.0                   | 2.1        | 23.8              | 2.3         | 25.6                 | 0.5       |
| C13        | 17.6                | 22.4                   | 4.8        | 17.1              | 0.5         | 17.3                 | 0.3       |
| C1         | 17.2                | 15.6                   | 1.6        | 16.2              | 1.0         | 16.6                 | 0.6       |
| C14        | 14.9                | 14.1                   | 0.8        | 14.0              | 0.9         | 14.9                 | 0.0       |
|            | M.A.D. <sup>2</sup> |                        | 3.4        |                   | 2.0         |                      | 1.4       |
|            | MAX <sup>3</sup>    |                        | <b>9.9</b> |                   | 4.2         |                      | 2.9       |
| H27        | 6.95                | 7.11                   | 0.16       | 6.95              | 0.14        | 7.11                 | 0.16      |
| H26        | 6.93                | 7.09                   | 0.16       | 6.93              | 0.06        | 7.09                 | 0.16      |
| H29        | 4.21                | 4.09                   | 0.12       | 4.21              | 0.13        | 4.24                 | 0.03      |
| H23        | 3.51                | 3.53                   | 0.02       | 3.51              | <b>0.42</b> | 3.54                 | 0.03      |
| H17-19     | 2.28                | 2.56                   | 0.18       | 2.38              | 0.09        | 2.48                 | 0.10      |
| H28,31,33  | 1.36                | 1.29                   | 0.07       | 1.36              | 0.01        | 1.46                 | 0.10      |
| H30,32,25  | 1.28                | 1.30                   | 0.02       | 1.28              | 0.02        | 1.32                 | 0.04      |
| H20-22     | 1.28                | 1.36                   | 0.08       | 1.28              | 0.07        | 1.39                 | 0.11      |
|            | M.A.D. <sup>2</sup> |                        | 0.10       |                   | 0.12        |                      | 0.09      |
|            | MAX <sup>3</sup>    |                        | 0.18       |                   | <b>0.42</b> |                      | 0.16      |

<sup>1</sup>Protons not seen in the experimental NMRs are not included here (OH's and acid H). <sup>2</sup> Mean absolute deviation. <sup>3</sup> Maximum absolute deviation. Deviations of <5 ppm (<sup>13</sup>C) and <0.3 ppm (<sup>1</sup>H) are generally considered acceptable.<sup>9-13</sup>

### Energy profile and computed chemical shifts for B3LYP-D3 optimized structures:

Compound 1 (Anhydride):

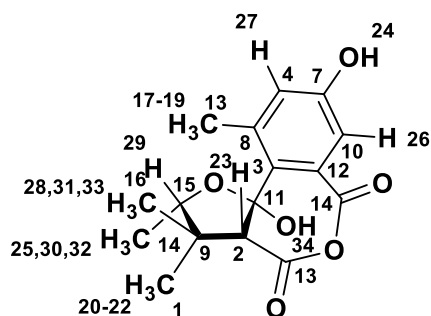

**Energy profiles** for the conformers found for compound 1. The percent population is shown, with those included in the calculation highlighted in green. Data is sorted by relative Gibb's free energy.

| B3LYP/6-31G(d) |                       |              |
|----------------|-----------------------|--------------|
|                | $\Delta G$ (kcal/mol) | % population |
| 8.log          | 0.000                 | 48.9         |
| 5.log          | 0.511                 | 20.6         |
| 1.log          | 0.556                 | 19.1         |
| 2.log          | 1.154                 | 7.0          |
| 3.log          | 1.443                 | 4.3          |
| 9.log          | 216.628               |              |

**Computed chemical shifts** (ppm) for compound 1. Values were obtained by scaling the calculated isotropic values of individual atoms, using the scaling factors noted in the method section. The chemical shifts shown are Boltzmann weighted average of the corresponding conformers. Mean absolute deviations (MADs) (between the computed and experimental numbers, ppm) maximum absolute deviations (MAXs) are also included.

| <sup>13</sup> C |        |        | Isolation <sup>1</sup> |           | Synthesis <sup>2</sup> |           |
|-----------------|--------|--------|------------------------|-----------|------------------------|-----------|
| Expt. #s        | Comp # | Comp.  | Expt.                  | Abs. Dev. | Expt.                  | Abs. Dev. |
| C17             | C9     | 46.70  | 43.8                   | 2.9       | 43.8                   | 2.9       |
| C1              | C2     | 65.44  | 60.7                   | 4.7       | 60.4                   | 5.0       |
| C15             | C15    | 84.97  | 87.5                   | 2.5       | 87.4                   | 2.4       |
| C18             | C16    | 23.97  | 26.2                   | 2.2       | 26.1                   | 2.1       |
| C19             | C1     | 15.59  | 17.3                   | 1.7       | 17.2                   | 1.6       |
| C13             | C3     | 133.84 | 137.5                  | 3.7       | 137.4                  | 3.6       |

|     |     |        |             |            |             |            |
|-----|-----|--------|-------------|------------|-------------|------------|
| C11 | C8  | 140.01 | 136.1       | 3.9        | 136.2       | 3.8        |
| C4  | C12 | 132.24 | 131.0       | 1.2        | 131.0       | 1.2        |
| C10 | C4  | 123.39 | 124.6       | 1.2        | 124.7       | 1.3        |
| C8  | C10 | 115.64 | 108.6       | 7.0        | 108.6       | 7.0        |
| C9  | C7  | 156.77 | 160.9       | 4.1        | 161.0       | 4.2        |
| C14 | C11 | 103.20 | 113.3       | 10.1       | 113.1       | 9.9        |
| C2  | C5  | 168.66 | 170.4       | 1.7        | 170.4       | 1.7        |
| C3  | C6  | 168.79 | 170.8       | 2.0        | 170.7       | 1.9        |
| C12 | C13 | 22.36  | 17.6        | 4.8        | 17.6        | 4.8        |
| C16 | C14 | 14.07  | 15.0        | 0.9        | 14.9        | 0.8        |
|     |     |        | <b>MAD:</b> | <b>3.4</b> | <b>MAD:</b> | <b>3.4</b> |

\*Literature reference for experimental data.

| <sup>1</sup> H |               |       | Isolation <sup>1</sup> |             | Synthesis <sup>2</sup> |             |
|----------------|---------------|-------|------------------------|-------------|------------------------|-------------|
| Expt. #s       | Comp #        | Comp. | Expt.                  | Abs. Dev.   | Expt.                  | Abs. Dev.   |
| C1             | H23           | 3.53  | 3.55                   | 0.02        | 3.51                   | 0.02        |
| C15            | H29           | 4.09  | 4.24                   | 0.15        | 4.21                   | 0.12        |
| C10            | H27           | 7.11  | 6.97                   | 0.14        | 6.95                   | 0.16        |
| C8             | H26           | 7.09  | 6.99                   | 0.10        | 6.93                   | 0.16        |
| -              | H24           |       | n.o.                   |             | n.o.                   |             |
| -              | H34           |       | n.o.                   |             | n.o.                   |             |
| C16            | ave(25,30,32) | 1.30  | 1.32                   | 0.02        | 1.28                   | 0.02        |
| C18            | ave(28,31,33) | 1.29  | 1.38                   | 0.09        | 1.36                   | 0.07        |
| C19            | ave(20-22)    | 1.36  | 1.32                   | 0.04        | 1.28                   | 0.08        |
| C12            | ave(17-19)    | 2.56  | 2.24                   | 0.32        | 2.38                   | 0.18        |
|                |               |       | <b>MAD:</b>            | <b>0.11</b> | <b>MAD:</b>            | <b>0.10</b> |

\*Literature reference for experimental data.

Compound 4 (Intermediate):

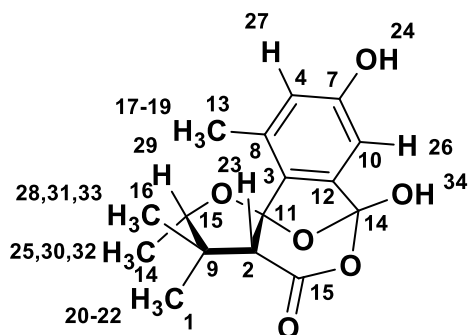

**Energy profiles** for the conformers found for compound 4. The percent population is shown, with those included in the calculation highlighted in green. Data is sorted by relative Gibb's free energy.

| B3LYP/6-31G(d) |                       |              |
|----------------|-----------------------|--------------|
|                | $\Delta G$ (kcal/mol) | % population |
| 1.log          | 0.000                 | 62.7         |
| 2.log          | 0.353                 | 34.6         |
| 5.log          | 2.112                 | 1.8          |
| 4.log          | 2.450                 | 1.0          |
| 3.log          | 2.686                 |              |

**Computed chemical shifts** (ppm) for compound **4**. Values were obtained by scaling the calculated isotropic values of individual atoms, using the scaling factors noted in the method section. The chemical shifts shown are Boltzmann weighted average of the corresponding conformers. Mean absolute deviations (MADs) (between the computed and experimental numbers, ppm) maximum absolute deviations (MAXs) are also included.

| <sup>13</sup> C |        |        | Isolation <sup>1</sup> |            | Synthesis <sup>2</sup> |            |
|-----------------|--------|--------|------------------------|------------|------------------------|------------|
| Expt. #s        | Comp # | Comp.  | Expt.                  | Abs. Dev.  | Expt.                  | Abs. Dev.  |
| C17             | C9     | 46.73  | 43.8                   | 2.9        | 43.8                   | 2.9        |
| C1              | C2     | 61.83  | 60.7                   | 1.1        | 60.4                   | 1.4        |
| C15             | C15    | 87.52  | 87.5                   | 0.0        | 87.4                   | 0.1        |
| C18             | C16    | 23.93  | 26.2                   | 2.3        | 26.1                   | 2.2        |
| C19             | C1     | 16.46  | 17.3                   | 0.8        | 17.2                   | 0.7        |
| C13             | C3     | 131.36 | 137.5                  | 6.1        | 137.4                  | 6.0        |
| C11             | C8     | 137.13 | 136.1                  | 1.0        | 136.2                  | 0.9        |
| C4              | C12    | 139.89 | 131.0                  | 8.9        | 131.0                  | 8.9        |
| C10             | C4     | 117.97 | 124.6                  | 6.6        | 124.7                  | 6.7        |
| C8              | C10    | 104.03 | 108.6                  | 4.6        | 108.6                  | 4.6        |
| C9              | C7     | 158.49 | 160.9                  | 2.4        | 161.0                  | 2.5        |
| C14             | C11    | 111.74 | 113.3                  | 1.6        | 113.1                  | 1.4        |
| C2              | C5     | 17.51  | 17.6                   | 0.1        | 17.6                   | 0.1        |
| C3              | C6     | 117.59 | 170.8                  | 53.2       | 170.7                  | 53.1       |
| C12             | C13    | 173.59 | 170.4                  | 3.2        | 170.4                  | 3.2        |
| C16             | C14    | 13.86  | 15.0                   | 1.1        | 14.9                   | 1.0        |
|                 |        |        | <b>MAD:</b>            | <b>6.0</b> | <b>MAD:</b>            | <b>6.0</b> |

| <sup>1</sup> H |        |       | Isolation <sup>1</sup> |           | Synthesis <sup>2</sup> |           |
|----------------|--------|-------|------------------------|-----------|------------------------|-----------|
| Expt. #s       | Comp # | Comp. | Expt.                  | Abs. Dev. | Expt.                  | Abs. Dev. |
| C1             | H23    | 3.23  | 3.55                   | 0.32      | 3.51                   | 0.28      |
| C15            | H29    | 4.44  | 4.24                   | 0.20      | 4.21                   | 0.23      |
| C10            | H27    | 6.84  | 6.97                   | 0.13      | 6.95                   | 0.11      |
| C8             | H26    | 6.93  | 6.99                   | 0.06      | 6.93                   | 0.00      |
| -              | H24    | 5.27  | n.o.                   |           | n.o.                   |           |
| -              | H34    | 4.09  | n.o.                   |           | n.o.                   |           |

|     |               |      |             |             |             |             |
|-----|---------------|------|-------------|-------------|-------------|-------------|
| C16 | ave(25,30,32) | 1.32 | 1.32        | 0.00        | 1.28        | 0.04        |
| C18 | ave(28,31,33) | 1.17 | 1.38        | 0.21        | 1.36        | 0.19        |
| C19 | ave(20-22)    | 1.35 | 1.32        | 0.03        | 1.28        | 0.07        |
| C12 | ave(17-19)    | 2.42 | 2.24        | 0.18        | 2.38        | 0.04        |
|     |               |      | <b>MAD:</b> | <b>0.14</b> | <b>MAD:</b> | <b>0.12</b> |

\*Literature reference for experimental data.

### Compound 2 (Carboxylic Acid):

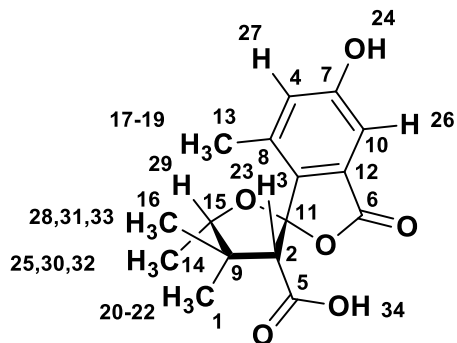

**Energy profiles** for the conformers found for compound 2. The percent population is shown, with those included in the calculation highlighted in green. Data is sorted by relative Gibb's free energy.

| B3LYP/6-31G(d) |                       |              |
|----------------|-----------------------|--------------|
|                | $\Delta G$ (kcal/mol) | % population |
| 2.log          | 0                     | 44           |
| 1.log          | 0.284                 | 27.3         |
| 3.log          | 0.635                 | 15.1         |
| 4.log          | 1.035                 | 7.7          |
| 9.log          | 1.381                 | 4.3          |
| 10.log         | 1.999                 | 1.5          |
| 8.log          | 4.14                  |              |
| 5.log          | 4.59                  |              |
| 6.log          | 5.22                  |              |
| 7.log          | 4.95                  |              |
| 12.log         | 6.86                  |              |
| 14.log         | 7.69                  |              |

**Computed chemical shifts** (ppm) for compound 2. Values were obtained by scaling the calculated isotropic values of individual atoms, using the scaling factors noted in the method section. The chemical shifts shown are Boltzmann weighted average of the corresponding conformers. Mean absolute deviations (MADs) (between the computed and experimental numbers, ppm) maximum absolute deviations (MAXs) are also included.

| <sup>13</sup> C |        |        | Isolation <sup>1</sup> |            | Synthesis <sup>2</sup> |            |
|-----------------|--------|--------|------------------------|------------|------------------------|------------|
| Expt. #s        | Comp # | Comp.  | Expt.                  | Abs. Dev.  | Expt.                  | Abs. Dev.  |
| C17             | C9     | 16.18  | 17.3                   | 1.1        | 17.2                   | 1.0        |
| C1              | C2     | 58.38  | 60.7                   | 2.3        | 60.4                   | 2.0        |
| C15             | C15    | 135.66 | 137.5                  | 1.8        | 137.4                  | 1.7        |
| C18             | C16    | 122.51 | 124.6                  | 2.1        | 124.7                  | 2.2        |
| C19             | C1     | 170.12 | 170.4                  | 0.3        | 170.4                  | 0.3        |
| C13             | C3     | 168.63 | 170.8                  | 2.2        | 170.7                  | 2.1        |
| C11             | C8     | 156.81 | 160.9                  | 4.1        | 161.0                  | 4.2        |
| C4              | C12    | 136.80 | 136.1                  | 0.7        | 136.2                  | 0.6        |
| C10             | C4     | 46.83  | 43.8                   | 3.0        | 43.8                   | 3.0        |
| C8              | C10    | 106.47 | 108.6                  | 2.1        | 108.6                  | 2.1        |
| C9              | C7     | 109.87 | 113.3                  | 3.4        | 113.1                  | 3.2        |
| C14             | C11    | 127.42 | 131.0                  | 3.6        | 131.0                  | 3.6        |
| C2              | C5     | 17.06  | 17.6                   | 0.5        | 17.6                   | 0.5        |
| C3              | C6     | 14.03  | 15.0                   | 1.0        | 14.9                   | 0.9        |
| C12             | C13    | 85.23  | 87.5                   | 2.3        | 87.4                   | 2.2        |
| C16             | C14    | 23.85  | 26.2                   | 2.4        | 26.1                   | 2.3        |
|                 |        |        | <b>MAD:</b>            | <b>2.1</b> | <b>MAD:</b>            | <b>2.0</b> |

\*Literature reference for experimental data.

| <sup>1</sup> H |               |       | Isolation <sup>1</sup> |             | Synthesis <sup>2</sup> |             |
|----------------|---------------|-------|------------------------|-------------|------------------------|-------------|
| Expt. #s       | Comp #        | Comp. | Expt.                  | Abs. Dev.   | Expt.                  | Abs. Dev.   |
| C1             | H23           | 3.93  | 3.55                   | 0.38        | 3.51                   | 0.42        |
| C15            | H29           | 4.34  | 4.24                   | 0.10        | 4.21                   | 0.13        |
| C10            | H27           | 7.09  | 6.97                   | 0.12        | 6.95                   | 0.14        |
| C8             | H26           | 6.99  | 6.99                   | 0.00        | 6.93                   | 0.06        |
| -              | H24           | 5.32  | n.o.                   |             | n.o.                   |             |
| -              | H34           | 6.89  | n.o.                   |             | n.o.                   |             |
| C16            | ave(25,30,32) | 1.30  | 1.32                   | 0.02        | 1.28                   | 0.02        |
| C18            | ave(28,31,33) | 1.37  | 1.38                   | 0.01        | 1.36                   | 0.01        |
| C19            | ave(20-22)    | 1.35  | 1.32                   | 0.03        | 1.28                   | 0.07        |
| C12            | ave(17-19)    | 2.47  | 2.24                   | 0.23        | 2.38                   | 0.09        |
|                |               |       | <b>MAD:</b>            | <b>0.11</b> | <b>MAD:</b>            | <b>0.12</b> |

\*Literature reference for experimental data.

Deprotonated Compound 2 (Carboxylate):

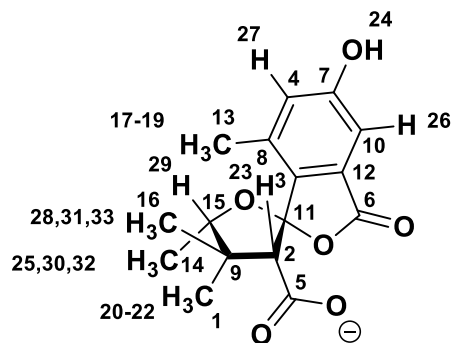

**Energy profiles** for the conformers found for deprotonated **2**. The percent population is shown, with those included in the calculation highlighted in green. Data is sorted by relative Gibb's free energy.

| B3LYP/6-31G(d) |                       |              |
|----------------|-----------------------|--------------|
|                | $\Delta G$ (kcal/mol) | % population |
| 2.log          | 0.000                 | 80.0         |
| 1.log          | 0.820                 | 20.0         |

**Computed chemical shifts** (ppm) for compound deprotonated **2**. Values were obtained by scaling the calculated isotropic values of individual atoms, using the scaling factors noted in the method section. The chemical shifts shown are Boltzmann weighted average of the corresponding conformers. Mean absolute deviations (MADs) (between the computed and experimental numbers, ppm) maximum absolute deviations (MAXs) are also included.

| $^{13}\text{C}$ |        |        | Isolation <sup>1</sup> |            | Synthesis <sup>2</sup> |            |
|-----------------|--------|--------|------------------------|------------|------------------------|------------|
| Expt. #s        | Comp # | Comp.  | Expt.                  | Abs. Dev.  | Expt.                  | Abs. Dev.  |
| C17             | C9     | 16.60  | 17.3                   | 0.7        | 17.2                   | 0.6        |
| C1              | C2     | 60.90  | 60.7                   | 0.2        | 60.4                   | 0.5        |
| C15             | C15    | 140.35 | 137.5                  | 2.8        | 137.4                  | 2.9        |
| C18             | C16    | 122.69 | 124.6                  | 1.9        | 124.7                  | 2.0        |
| C19             | C1     | 172.59 | 170.4                  | 2.2        | 170.4                  | 2.2        |
| C13             | C3     | 172.16 | 170.8                  | 1.4        | 170.7                  | 1.5        |
| C11             | C8     | 158.43 | 160.9                  | 2.5        | 161.0                  | 2.6        |
| C4              | C12    | 137.52 | 136.1                  | 1.4        | 136.2                  | 1.3        |
| C10             | C4     | 46.52  | 43.8                   | 2.7        | 43.8                   | 2.7        |
| C8              | C10    | 107.58 | 108.6                  | 1.0        | 108.6                  | 1.0        |
| C9              | C7     | 115.57 | 113.3                  | 2.3        | 113.1                  | 2.5        |
| C14             | C11    | 131.65 | 131.0                  | 0.6        | 131.0                  | 0.6        |
| C2              | C5     | 17.27  | 17.6                   | 0.3        | 17.6                   | 0.3        |
| C3              | C6     | 14.91  | 15.0                   | 0.1        | 14.9                   | 0.0        |
| C12             | C13    | 85.52  | 87.5                   | 2.0        | 87.4                   | 1.9        |
| C16             | C14    | 25.64  | 26.2                   | 0.6        | 26.1                   | 0.5        |
|                 |        |        | <b>MAD:</b>            | <b>1.4</b> | <b>MAD:</b>            | <b>1.4</b> |



\*Literature reference for experimental data.

| <sup>1</sup> H |               |       | Isolation <sup>1</sup> |             | Synthesis <sup>2</sup> |             |
|----------------|---------------|-------|------------------------|-------------|------------------------|-------------|
| Expt. #s       | Comp #        | Comp. | Expt.                  | Abs. Dev.   | Expt.                  | Abs. Dev.   |
| C1             | H23           | 3.54  | 3.55                   | 0.01        | 3.51                   | 0.03        |
| C15            | H29           | 4.24  | 4.24                   | 0.00        | 4.21                   | 0.03        |
| C10            | H27           | 7.11  | 6.97                   | 0.14        | 6.95                   | 0.16        |
| C8             | H26           | 7.09  | 6.99                   | 0.10        | 6.93                   | 0.16        |
| -              | H24           | 5.18  | n.o.                   |             | n.o.                   |             |
| C16            | H34           | 1.32  | 1.32                   | 0.00        | 1.28                   | 0.04        |
| C18            | ave(25,30,32) | 1.46  | 1.38                   | 0.08        | 1.36                   | 0.10        |
| C19            | ave(28,31,33) | 1.39  | 1.32                   | 0.07        | 1.28                   | 0.11        |
| C12            | ave(20-22)    | 2.48  | 2.24                   | 0.24        | 2.38                   | 0.10        |
|                | ave(17-19)    |       | <b>MAD:</b>            | <b>0.08</b> | <b>MAD:</b>            | <b>0.09</b> |

\*Literature reference for experimental data.

### *Full Gaussian References*

Gaussian 09, Revision B.01,

M. J. Frisch, G. W. Trucks, H. B. Schlegel, G. E. Scuseria, M. A. Robb, J. R. Cheeseman, G. Scalmani, V. Barone, B. Mennucci, G. A. Petersson, H. Nakatsuji, M. Caricato, X. Li, H. P. Hratchian, A. F. Izmaylov, J. Bloino, G. Zheng, J. L. Sonnenberg, M. Hada, M. Ehara, K. Toyota, R. Fukuda, J. Hasegawa, M. Ishida, T. Nakajima, Y. Honda, O. Kitao, H. Nakai, T. Vreven, J. A. Montgomery, Jr., J. E. Peralta, F. Ogliaro, M. Bearpark, J. J. Heyd, E. Brothers, K. N. Kudin, V. N. Staroverov, T. Keith, R. Kobayashi, J. Normand, K. Raghavachari, A. Rendell, J. C. Burant, S. S. Iyengar, J. Tomasi, M. Cossi, N. Rega, J. M. Millam, M. Klene, J. E. Knox, J. B. Cross, V. Bakken, C. Adamo, J. Jaramillo, R. Gomperts, R. E. Stratmann, O. Yazyev, A. J. Austin, R. Cammi, C. Pomelli, J. W. Ochterski, R. L. Martin, K. Morokuma, V. G. Zakrzewski, G. A. Voth, P. Salvador, J. J. Dannenberg, S. Dapprich, A. D. Daniels, O. Farkas, J. B. Foresman, J. V. Ortiz, J. Cioslowski, and D. J. Fox, Gaussian, Inc., Wallingford CT, 2010.

Gaussian 09, Revision D.01,

M. J. Frisch, G. W. Trucks, H. B. Schlegel, G. E. Scuseria, M. A. Robb, J. R. Cheeseman, G. Scalmani, V. Barone, B. Mennucci, G. A. Petersson, H. Nakatsuji, M. Caricato, X. Li, H. P. Hratchian, A. F. Izmaylov, J. Bloino, G. Zheng, J. L. Sonnenberg, M. Hada, M. Ehara, K. Toyota, R. Fukuda, J. Hasegawa, M. Ishida, T. Nakajima, Y. Honda, O. Kitao, H. Nakai, T. Vreven, J. A. Montgomery, Jr., J. E. Peralta, F. Ogliaro, M. Bearpark, J. J. Heyd, E. Brothers, K. N. Kudin, V. N. Staroverov, T. Keith, R. Kobayashi, J. Normand, K. Raghavachari, A. Rendell, J. C. Burant, S. S. Iyengar, J. Tomasi, M. Cossi, N. Rega, J. M. Millam, M.

Klene, J. E. Knox, J. B. Cross, V. Bakken, C. Adamo, J. Jaramillo, R. Gomperts, R. E. Stratmann, O. Yazyev, A. J. Austin, R. Cammi, C. Pomelli, J. W. Ochterski, R. L. Martin, K. Morokuma, V. G. Zakrzewski, G. A. Voth, P. Salvador, J. J. Dannenberg, S. Dapprich, A. D. Daniels, O. Farkas, J. B. Foresman, J. V. Ortiz, J. Cioslowski, and D. J. Fox, Gaussian, Inc., Wallingford CT, 2013.

1. Elsebai, M. F.; Nazir, M.; Kehraus, S.; Egereva, E.; Ioset, K. N.; Marcourt, L.; Jeannerat, D.; Gütschow, M.; Wolfender, J.-L.; König, G. M., Polyketide Skeletons from the Marine Alga-Derived Fungus *Coniothyrium cereale*. *European Journal of Organic Chemistry* **2012**, 2012 (31), 6197-6203.
2. Ren, Z.; Hao, Y.; Hu, X., Total Synthesis and Structural Reassignment of ( $\pm$ )-Cereoanhydride. *Organic Letters* **2016**, 18 (19), 4958-4961.
3. Hagen, R.; Roberts, J. D., Nuclear magnetic resonance spectroscopy. Carbon-13 spectra of aliphatic carboxylic acids and carboxylate anions. *Journal of the American Chemical Society* **1969**, 91 (16), 4504-4506.
4. Gottlieb, H. E.; Kotlyar, V.; Nudelman, A., NMR Chemical Shifts of Common Laboratory Solvents as Trace Impurities. *The Journal of Organic Chemistry* **1997**, 62 (21), 7512-7515.
5. Hua-Jian Xu, Yong-Qiang Zhao, and Xin-Feng Zhou, Palladium-Catalyzed Heck Reaction of Aryl Chlorides under Mild Conditions Promoted by Organic Ionic Bases, *Journal of Organic Chemistry*, **2011**, 76 (19), pp 8036–8041.
6. Schah-Mohammedi, P.; Shenderovich, I. G.; Detering, C.; Limbach, H.-H.; Tolstoy, P. M.; Smirnov, S. N.; Denisov, G. S.; Golubev, N. S., Hydrogen/Deuterium-Isotope Effects on NMR Chemical Shifts and Symmetry of Homoconjugated Hydrogen-Bonded Ions in Polar Solution. *Journal of the American Chemical Society* **2000**, 122 (51), 12878-12879.
7. Spectral Database for Organic Compounds (SDBS); NMR spectrum; SDBS No.: 1033HSP-03-549; <http://riodb01.ibase.aist.go.jp/sdbs/>
8. Spectral Database for Organic Compounds (SDBS); NMR spectrum; SDBS No.: 610HPM-00-375; <http://riodb01.ibase.aist.go.jp/sdbs/>
9. Lodewyk, M. W.; Siebert, M. R.; Tantillo, D. J., Computational Prediction of  $^1\text{H}$  and  $^{13}\text{C}$  Chemical Shifts: A Useful Tool for Natural Product, Mechanistic, and Synthetic Organic Chemistry. *Chemical Reviews* **2012**, 112 (3), 1839-1862.
10. Tantillo, D. J., Walking in the woods with quantum chemistry - applications of quantum chemical calculations in natural products research. *Natural Product Reports* **2013**, 30 (8), 1079-1086.
11. Di Micco, S.; Chini, M. G.; Riccio, R.; Bifulco, G., Quantum Mechanical Calculation of NMR Parameters in the Stereostructural Determination of Natural Products. *European Journal of Organic Chemistry* **2010**, 2010 (8), 1411-1434.
12. Grimblat, N.; Sarotti, A. M., Computational Chemistry to the Rescue: Modern Toolboxes for the Assignment of Complex Molecules by GIAO NMR Calculations. *Chemistry – A European Journal* **2016**, 22 (35), 12246-12261.
13. Willoughby, P. H.; Jansma, M. J.; Hoye, T. R., A guide to small-molecule structure assignment through computation of ( $^1\text{H}$  and  $^{13}\text{C}$ ) NMR chemical shifts. *Nat. Protocols* **2014**, 9 (3), 643-660.
